1 Current Opinion

2

3 **A critical re-evaluation of multilocus sequence typing (MLST) efforts in *Wolbachia***

4

5 Christoph Bleidorn<sup>1,2,3\*</sup> & Michael Gerth<sup>4</sup>

6

7 <sup>2</sup>Animal Evolution and Biodiversity, Georg-August-University Göttingen, Göttingen,  
8 Germany.

9 <sup>2</sup>Museo Nacional de Ciencias Naturales, Spanish National Research Council (CSIC),  
10 Madrid, Spain.

11 <sup>3</sup>German Centre for Integrative Biodiversity Research (iDiv) Halle-Jena-Leipzig,  
12 Leipzig, Germany.

13 <sup>4</sup>Institute for Integrative Biology, University of Liverpool, Liverpool, UK.

14

15

16 \*Correspondence to:

17 Christoph Bleidorn

18 Georg-August-University Göttingen

19 Johann-Friedrich-Blumenbach Institute for Zoology & Anthropology

20 Animal Evolution and Biodiversity

21 Untere Karspuele 2

22 37073 Göttingen

23 Germany

24 Email: [christoph.bleidorn@gmail.com](mailto:christoph.bleidorn@gmail.com)

25

26 Keywords: phylogenetic informativeness, phylogeny, MLST, recombination, strain  
27 typing, *Wolbachia*

28 **Abstract**

29 *Wolbachia* (Alphaproteobacteria, Rickettsiales) is the most common, and  
30 arguably one of the most important inherited symbionts. Molecular differentiation of  
31 *Wolbachia* strains is routinely performed with a set of five multilocus sequence typing  
32 (MLST) markers. However, since its inception in 2006, the performance of MLST in  
33 *Wolbachia* strain typing has not been assessed objectively. Here, we evaluate the  
34 properties of *Wolbachia* MLST markers and compare it to 252 other single copy loci  
35 present in the genome of most *Wolbachia* strains. Specifically, we investigated how well  
36 MLST performs at strain differentiation, at reflecting genetic diversity of strains, and as  
37 phylogenetic marker. We find that MLST loci are outperformed by other loci at all tasks  
38 they are currently employed for, and thus that they do not reflect the properties of a  
39 *Wolbachia* strain very well. We argue that whole genome typing approaches should be  
40 used for *Wolbachia* typing in the future. Alternatively, if few-loci-approaches are  
41 necessary, we provide a characterization of 252 single copy loci for a number a criteria,  
42 which may assist in designing specific typing systems or phylogenetic studies.

## 43 **Introduction**

44 *Wolbachia* is a genus of maternally inherited intracellular Alphaproteobacteria  
45 that is found in arthropod and nematode hosts (Werren et al. 2008). Meta-analyses  
46 suggest that between 40% and 52% of all terrestrial arthropods are infected, making  
47 these bacteria the most common animal endosymbiont on earth (Zug & Hammerstein  
48 2012; Weinert et al. 2015). Host specificity and type of symbiosis differs between major  
49 lineages of *Wolbachia*, which are currently classified into 16 supergroups named with  
50 capital letters from A–F and H–Q, consecutively in the order of their description  
51 (Glowska et al. 2015; Gerth 2016). Supergroups A and B are found in arthropods,  
52 representing the vast majority of described *Wolbachia* lineages. Many different types of  
53 symbioses, including reproductive parasitism, facultative mutualism, and obligate  
54 mutualism have been found for these lineages (Zug & Hammerstein 2015). In contrast,  
55 supergroups C and D are restricted to filarial nematodes, with which they share a close  
56 relationship that can be described as obligate mutualism (Makepeace & Gill 2016).  
57 Supergroup F has been found in both nematodes and arthropods and all other  
58 supergroups are rather rare, limited to a single or few hosts (Gerth et al. 2014).

59 Several host manipulations have been described for *Wolbachia*, and it is thought  
60 that those accelerate their spread in host populations, such as male-killing, feminization,  
61 induction of parthogenesis, and cytoplasmic incompatibility (Werren et al. 2008). These  
62 manipulations are considered to have a predominantly negative effect on their hosts.  
63 However, several positive aspects for hosts have been reported as well. These include  
64 provision of the host with amino acids or vitamins, or protection against viruses  
65 (Hedges et al. 2008; Teixeira et al. 2008; Zug & Hammerstein 2015). It appears likely  
66 that positive fitness effects drive the establishment of novel *Wolbachia* infections in host  
67 populations (Fenton et al. 2011; Kriesner et al. 2013). Recently, field studies

68 demonstrated that mosquito populations can be artificially infected with fast spreading  
69 *Wolbachia* lineages which confer virus resistance to their hosts, thereby suppressing the  
70 transmission of the human pathogen Dengue (Hoffmann et al. 2011). However, not all  
71 strains of *Wolbachia* are able to confer virus resistance or to manipulate their host's  
72 reproduction (Makepeace & Gill 2016).

73 The growing interest in the peculiar biology of *Wolbachia*, and its almost  
74 universal distribution among arthropods have necessitated means to differentiate strains  
75 by using molecular methods. Initially, genetic characterization of *Wolbachia* diversity  
76 was based on the 16S rRNA gene (O'Neill et al. 1992) or the more variable *wsp* gene  
77 (Zhou et al. 1998). However, in 2006, a multilocus sequence typing (MLST) system was  
78 established, and this subsequently became a standard in the community of *Wolbachia*  
79 researchers (Baldo et al. 2006).

80 The MLST approach was developed to provide a reproducible and portable  
81 method for the molecular characterization of bacterial pathogens. Originally designed to  
82 monitor local and global *Neisseria meningitides* outbreaks (Maiden et al. 1998), MLST  
83 schemes have since been published for many other bacterial species (Maiden 2006). For  
84 strain typing, five to ten loci (usually conserved housekeeping genes) from different  
85 regions of the genome are sequenced and each unique allele is assigned a unique  
86 number. Thus, a universal nomenclature based on a code of numbers referring to the  
87 sequenced loci is assembled. MLST genes are selected under the assumption that they  
88 underlie purifying selection, resulting in sequence variation that is mostly neutral. In the  
89 absence of recombination, substitutions should accumulate approximately linearly with  
90 time (Francisco et al. 2009) and therefore, genetic distances between strains at MLST  
91 loci would be proportional to their divergence time. MLST data are usually provided in  
92 a curated form in a freely accessible database (Jolley et al. 2004). Based on MLST

93 profiles, relationships between (or diversity of) typed strains can either be analysed  
94 using the designated numbers from coding the alleles (i.e., MLST profiles), or by  
95 analysing the allelic nucleotide sequence data directly.

96 For *Wolbachia* MLST, fragments of five housekeeping genes (*gatB*, *coxA*, *hcpA*,  
97 *fbpA*, and *ftsZ*) are sequenced, and primers that amplify these loci across the major  
98 *Wolbachia* supergroups in arthropods are available (Baldo et al. 2006). According to the  
99 high number of citations for the original publication (Baldo et al. 2006, 343 citations in  
100 ISI Web of Science accessed August 17<sup>th</sup>, 2017), the approach is well-established and  
101 frequently used in the community of *Wolbachia* researchers. Since its original  
102 description more than 10 years ago, 2355 sequences and 472 unique MLST profiles  
103 have been added to the database (<https://pubmlst.org/wolbachia/>, accessed August 17<sup>th</sup>,  
104 2017). When MLST was conceived, only two *Wolbachia* strains were represented by a  
105 fully annotated genome, and therefore, it was not possible to test how well MLST  
106 reflects the true *Wolbachia* strain diversity. Now, with a plethora of strains characterized  
107 by MLST, and several complete or draft genomic sequences of *Wolbachia* strains  
108 available (>30 strains in public repositories), the efficiency and performance of  
109 *Wolbachia* MLST can be evaluated objectively.

110 In this article, we aim to do so by first identifying the most common tasks  
111 *Wolbachia* MLST has been employed for by the research community. Using whole-  
112 genome as well as MLST data, we next assess how well MLST performs in these tasks  
113 in comparison to other single copy loci. We will argue that there is not a single locus or  
114 a single set of loci that performs well in all questions that are commonly addressed by  
115 *Wolbachia* researchers. Although the MLST scheme is convenient in that it provides a  
116 readily employable set of molecular markers, its information content is critically  
117 dependent on the research objective and the set of strains analysed. We therefore

118 advocate that molecular markers for *Wolbachia* should be chosen very carefully for each  
119 particular research question, ideally based on whole-genome information.

## 120 **Usage of *Wolbachia* MLST in theory and research praxis**

121 Originally, MLST was aimed to provide “a reliable system for typing and  
122 quantifying strain diversity” that allows “tracing the movement of *Wolbachia* globally  
123 and within insect communities and for associating *Wolbachia* strains with geographic  
124 regions, host features (e.g., ecology and phylogeny), and phenotypic effects on hosts”  
125 (Baldo et al. 2006). In other words, ideally each *Wolbachia* strain in the MLST database  
126 would not only be represented by a MLST profile, but also be linked with taxonomic  
127 information about its host, geographic origin, and phenotypic effects. This would then  
128 enable comparative analyses. However, out of 1828 strains (“isolates”) currently listed  
129 in the MLST database, only 603 (~34%) are associated with host taxonomy on the level  
130 of host order, and even fewer are associated with a host species (542, ~30%). Similarly,  
131 only 577 isolates (~31%) have geographic information and a phenotype is only known  
132 from 92 strains (~5%). Thus, the majority of *Wolbachia* strains in the database are  
133 defined by their MLST profiles alone, which further are in most cases incomplete  
134 (~60% of strains lack one or more alleles). Although this likely impedes comparative  
135 analyses, the lack of metadata associated with *Wolbachia* MLST isolates is not a  
136 problem for strain definition as such. However, if MLST is the only definition for a  
137 *Wolbachia* strain, it is crucial to understand how appropriate this definition is and to  
138 ascertain that the MLST profile is not isolated from the biological properties of the  
139 typed strains.

140 In current practise, it is generally assumed that MLST markers are a good  
141 approximation of genome-wide characteristics of *Wolbachia* strains. As such, they have  
142 been used to describe and analyse the *Wolbachia* diversity, phylogeny, or

143 phylogeography of particular host taxa (Russell et al. 2009; Watanabe et al. 2012;  
144 Schuler et al. 2013; Zhang et al. 2013a; Sontowski et al. 2015), taxa from a particular  
145 ecological background/community (Stahlhut et al. 2010; Zhang et al. 2013b), and to  
146 explore horizontal movements of *Wolbachia* strains (Baldo et al. 2008; Gerth et al.  
147 2013; Ahmed et al. 2016). All of these research questions entail a number of implicit  
148 assumptions about the performance of *Wolbachia* MLST. We will in the following  
149 examine three of these assumptions that we consider most important in this regard:  
150 1) *Wolbachia* MLST can differentiate *Wolbachia* strains.  
151 2) Genetic divergence at *Wolbachia* MLST genes corresponds to genome-wide  
152 divergence levels  
153 3) *Wolbachia* MLST gene phylogeny reflects the phylogeny of the core genome.

#### 154 **Differentiating *Wolbachia* strains with MLST markers**

155 One common task for MLST in *Wolbachia* research is the discrimination (or  
156 “quantification” as in Baldo et al. 2006) of *Wolbachia* strains, i.e., to answer if two (or  
157 any other number) of strains are genetically different. For this task, the level of  
158 resolution depends on the number and type of genes used, length of the sequences and  
159 the genetic diversity of chosen loci (Cooper & Feil 2004). The limits of MLST schemes  
160 were pointed out for genetically monomorphic bacteria such as *Mycobacterium*  
161 *tuberculosis* or *Bacillus anthracis* (Achtman 2008; Achtman 2012). *Wolbachia* MLST  
162 diversity within supergroups is far from being monomorphic, as evident from the large  
163 number of available profiles in the database (see above). However, the actual  
164 evolutionary pace of *Wolbachia* genes and genomes was an open question. Recently,  
165 based on a time-calibrated phylogenomic analyses it was hypothesized that *Wolbachia*  
166 lineages are much older than previously assumed – and therefore that genetic change  
167 due to substitutions or recombination accumulate slower than expected (Gerth &

168 Bleidorn 2016). In accordance with this estimate, it was repeatedly reported that  
169 *Wolbachia* MLST is not suited to discriminate between closely related strains (Ishmael  
170 et al. 2009; Atyame et al. 2011; Riegler et al. 2012; Siozios et al. 2013a; Conner et al.  
171 2017). This does not come as a surprise, as per definition, MLST genes are of conserved  
172 nature, and thus slowly evolving. They are therefore inherently unsuited to trace very  
173 recent evolutionary events.

174 Comparing the ability of MLST loci to differentiate *Wolbachia* strains with that  
175 of 252 other single copy loci employed in a recent phylogenomic study of *Wolbachia*  
176 evolution (Gerth & Bleidorn 2016) shows that MLST loci are not ideal for this task  
177 (Supplementary Table 1). MLST loci are able to differentiate 42–63% of the 19  
178 analysed *Wolbachia* genomes, whereas other conserved single copy loci may  
179 differentiate up to 84% of the strains (16/19). *Wsp* is more variable than MLST markers  
180 (13/19 strains differentiated), but is outperformed by a number of single copy loci  
181 (Table S1). Strikingly, none of the 252 loci that were originally selected as phylogenetic  
182 markers can discriminate between all strains. This is because they were chosen to be  
183 present in a single copy in all of the analysed *Wolbachia* genomes (Gerth & Bleidorn  
184 2016) and thus also represent mostly conserved housekeeping loci (Supplementary  
185 Table 1). In summary, conserved single copy genes are generally unsuited markers to  
186 differentiate for closely related *Wolbachia* genomes, and among those, MLST and *wsp*  
187 loci do not perform particularly well.

188 Therefore, when designing an experiment with the main or foremost goal of  
189 differentiating *Wolbachia* strains, one should employ fast evolving markers such as  
190 ankyrin repeats, insertion sequences, or other mobile elements that have been shown to  
191 be the fastest evolving genomic features of *Wolbachia* (Wu et al. 2004; Tanaka et al.  
192 2009; Newton et al. 2016). As these will likely be very different between distantly



193 related strains (Cerveau et al. 2011), a universal set of markers suitable across the  
194 breadth of *Wolbachia* diversity does not exist. As a consequence, in many cases it will  
195 be inevitable to identify suitable markers for *Wolbachia* differentiation through  
196 comparative genomics of a representative sample of the strains to be investigated.

197 Furthermore, we advocate to adjust not only the type, but also the number of loci  
198 employed for strain differentiation. Random sampling MLST profiles from the known  
199 diversity of *Wolbachia* MLST profiles illustrates that in many cases, two or three MLST  
200 loci provide similar resolution to all five MLST genes (Fig. 1). For example, when  
201 analysing 20 *Wolbachia* strains and using only the two most variable MLST genes *hcpA*  
202 and *gatB*, one would on average be able to differentiate at least 19 of these strains. For  
203 40 strains, three loci provide a similar resolution (Fig. 1). Although this comes with the  
204 caveat that not all systems will show the same *Wolbachia* MLST profile frequencies as  
205 the MLST database, it demonstrates that careful adjustment of loci to the study system  
206 can save time and money. Instead of typing all *Wolbachia* samples with five MLST loci,  
207 we therefore recommend to maximise the number of detectable *Wolbachia* strains by  
208 first typing with the fastest evolving marker available (ideally, this would have been  
209 identified *a priori* through comparative genomics), and then continue with additional  
210 markers as the number of samples increases.

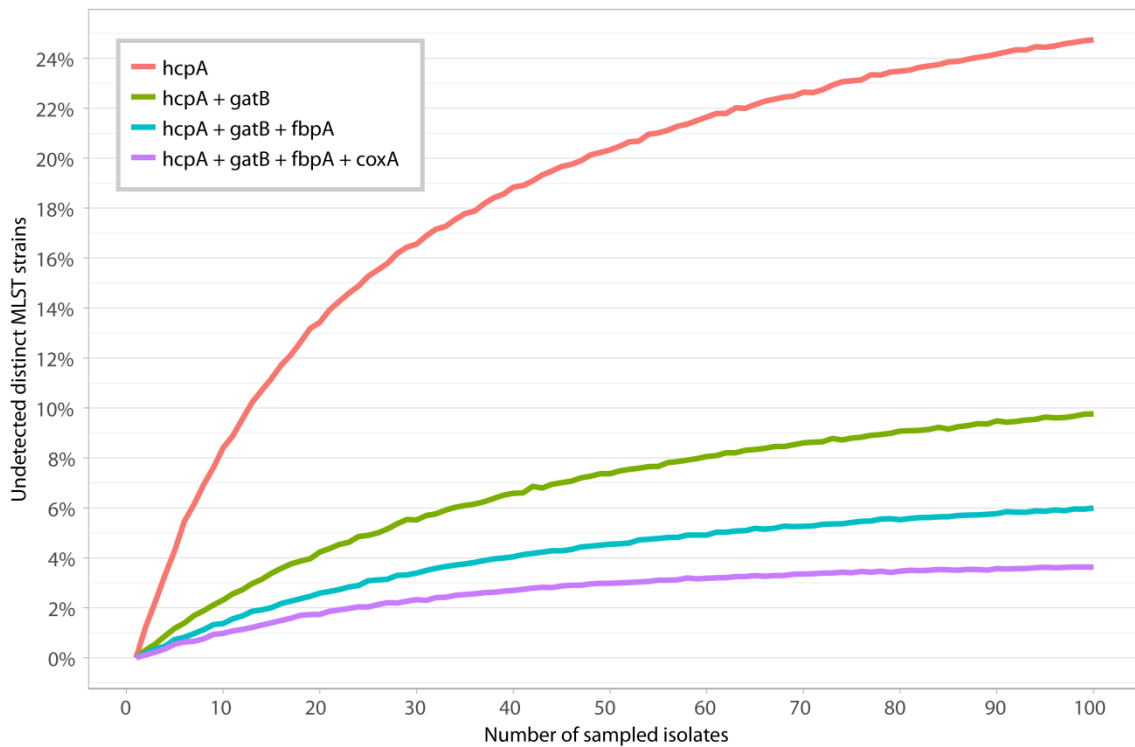

211

212 **Fig. 1** Ability of MLST markers in differentiating *Wolbachia* strains. Average  
213 proportion of undetected distinct *Wolbachia* MLST profiles when using only one, two,  
214 three or four MLST genes is displayed in relation to the number of analysed strains.  
215 Figure is based on all complete *Wolbachia* MLST profiles (740 in total, 472 of which  
216 are unique) currently available from the pubMLST database  
217 (<https://pubmlst.org/wolbachia/>, last accessed August 17<sup>th</sup>, 2017). See methods for  
218 details.

219

## 220 **Assessing genetic differentiation of *Wolbachia* strains with MLST genes**

221 In addition to differentiating strains, a strain typing system should also be able to  
222 characterize the genetic diversity of a set of strains to be analysed. For this to be as  
223 accurate as possible, the molecular divergence of investigated strains at their MLST loci  
224 would have to be identical or very similar to genome wide divergence rates, or correlate  
225 with genome wide rates very well. If the assumptions underlying the choice of MLST

226 loci (mostly neutral selection, see above) are correct, one might expect these two  
227 characteristics to be met. However, an analysis of MLST vs. core genome divergence  
228 rates shows that this is not true for the currently employed *Wolbachia* MLST loci (Fig.  
229 2). As expected from the previous observations (see above) core genome divergence of  
230 lower than ~0.2% cannot be detected with any of the MLST loci (Fig. 2). For *ftsZ*, even  
231 strains that are genetically divergent by more than 1% may appear identical.  
232 Furthermore, a number of strains that are diverged by 1.5–2% appear similarly  
233 divergent at their *ftsZ* and *fbpA* loci (Fig. 2). This may indicate nucleotide substitution  
234 saturation, which would impede genetic comparison of distantly related *Wolbachia*  
235 strains with MLST.

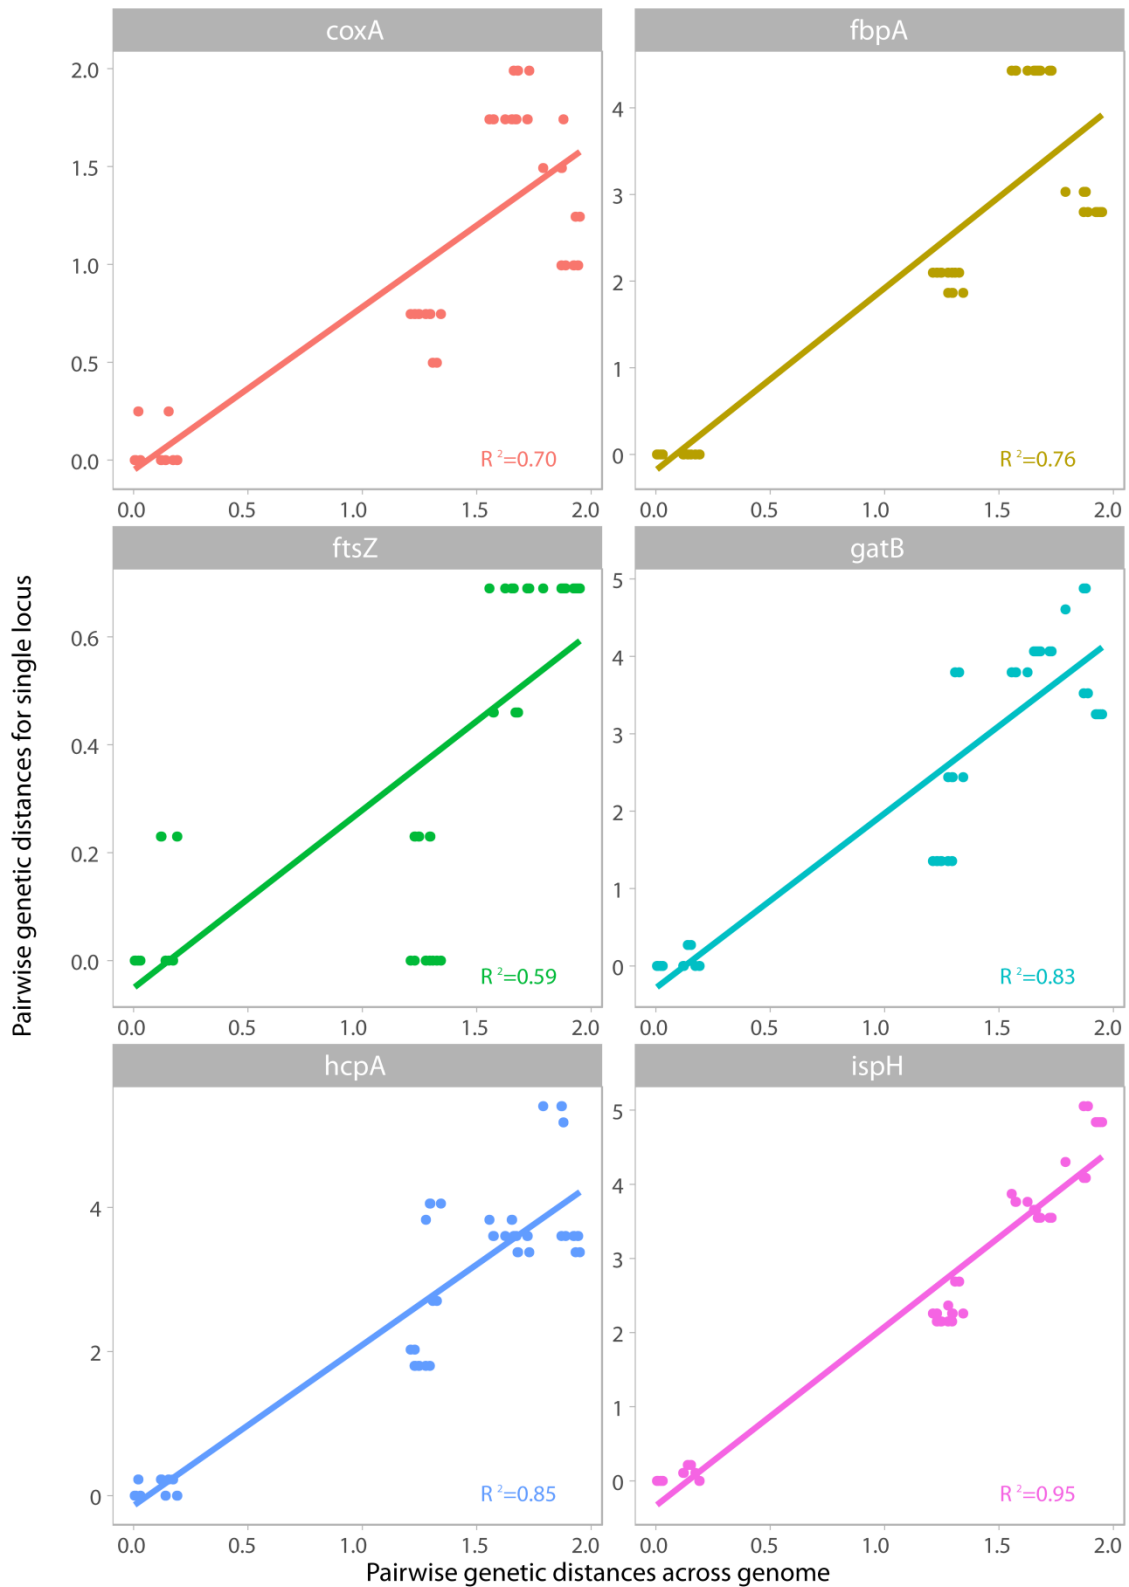

236

237 **Fig. 2** Correlation of genetic distances of *Wolbachia* strains at MLST loci to genome-  
238 wide distances. Each data point corresponds to a single pair of *Wolbachia* strains, and  
239 shows the divergence between these two strains at MLST loci (y-axis) and genome-

240 wide distance (x-axis, mean distance from 252 single copy orthologs). Panels  
241 correspond to one of the 5 MLST loci and *ispH* (encoding 4-hydroxy-3-methylbut-2-  
242 enyl diphosphate reductase) for comparison. Linear regression models were fitted using  
243 the R statistical environment (R Core Team 2015). All distances are displayed as raw  
244 genetic distances in percent. Please note that all pairwise distances are from supergroup  
245 A strains only, as including supergroup B strains would lead to skewed distributions  
246 (small distances within supergroups and large distances between supergroups) and  
247 therefore biased correlation estimates. All  $R^2$  values for all analysed loci and both  
248 supergroups can be found in Supplementary Table 1. Correlations of divergence at *wsp*  
249 vs core genome loci can be found in Supplementary Fig. 1.

250

251 Further to these patterns, out of the five MLST loci, only *coxA* shows genetic  
252 divergence rates similar to those obtained from whole genome information, whereas  
253 those of *ftsZ* are lower and the ones from *hcpA*, *fbpA* and *gatB* are higher (Fig. 2).  
254 Finally, none of the divergence rates estimated from the 5 MLST loci correlate very well  
255 with genome wide rates ( $R^2$  values of regression in linear model 0.59–0.85, Fig. 2),  
256 which contrasts with loci that show a very good correlation in this respect (e.g., *ispH*,  
257 Fig. 2). For *wsp*, the relation of genetic distances to core genome distances can be  
258 described as random (Supplementary Fig. 1). In summary, the MLST loci are not a good  
259 approximation for genome wide divergence rates of *Wolbachia* strains, and other loci  
260 may be more appropriate (Fig. 2, Supplementary Table 1). This also means that genetic  
261 divergence ratios obtained from MLST loci should be interpreted cautiously and other  
262 loci should be explored as alternative. However, as the performance at this task differs  
263 even for a single locus between supergroups (Supplementary Table 1), comparative

264 genomics will again in many cases be the only option to reliably determine divergence  
265 rates between a sample *Wolbachia* strains.

## 266 **Phylogenetic analyses of *Wolbachia* strains using MLST**

267 Judging from the abstracts and keywords of all articles citing the original  
268 *Wolbachia* MLST publication, questions that are commonly addressed with *Wolbachia*  
269 MLST are phylogeny & phylogeography (102 articles with corresponding terms), and  
270 horizontal transmission of strains (58 articles). Since the determination of horizontal  
271 transmission with molecular methods also requires phylogenetic approaches, one can  
272 summarize that phylogenies are one major field of application for *Wolbachia* MLST.  
273 This is despite the authors' original assessment that MLST loci are not necessarily good  
274 phylogenetic markers ("caution in interpretation of phylogenetic relationships is  
275 necessary", Baldo et al. 2006), and despite the fact that an assessment of its  
276 performance as phylogenetic marker as lacking.

277 The level of resolution across time for a given gene in a phylogenetic analysis  
278 can be estimated by its phylogenetic informativeness (PI), which measures the relative  
279 ratio of phylogenetic signal to noise across time (Townsend 2007). Analysing the PI  
280 profiles of all MLST genes for a set of *Wolbachia* strains covering supergroup A and B  
281 reveals that all of them show the highest phylogenetic resolution on the supergroup  
282 level (Fig. 3). According to Gerth & Bleidorn (2016), the supergroups A and B have  
283 diverged more than 200 million years ago. MLST genes however provide only little  
284 phylogenetic information for strains that diverged much more recently (Fig. 3). As  
285 *Wolbachia* likely moves between hosts at a fast rate (Gerth et al. 2013; Bailly-Bechet et  
286 al. 2017), the MLST approach is not suited to infer phylogenetic relationships of closely  
287 related strains, to detect recent horizontal transmissions or to assess ecological  
288 timescales of *Wolbachia* movements between populations. However, a number of

289 *Wolbachia* genes –including the highly recombining *wsp*- evolve considerably faster  
290 than MLST loci (as measured by genetic divergence or number of variable alignment  
291 sites) and also provide phylogenetic information on very shallow phylogenetic levels  
292 (Fig. 3, Supplementary Table 1, Supplementary Fig. 2). These loci might be good  
293 candidates for resolving very recent evolutionary events.

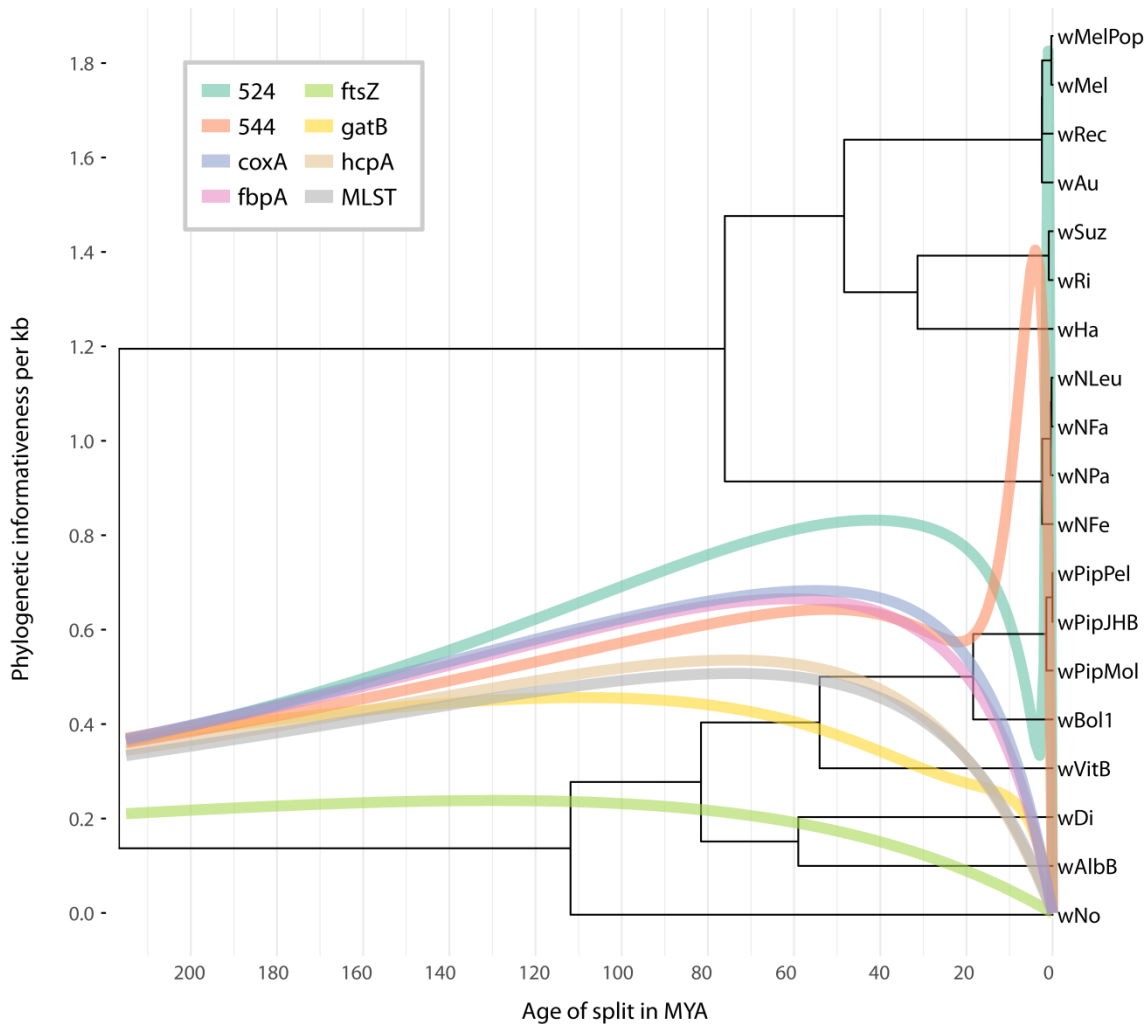

295 **Fig. 3** Phylogenetic informativeness (PI) of five MLST-gene alignments from  
296 supergroup A and B *Wolbachia* strains. For comparison, two loci displaying relatively  
297 high PI for recent evolutionary events are also shown. Ultrametric tree (based on 252  
298 loci available under [https://github.com/gerthmicha/wolbachia-](https://github.com/gerthmicha/wolbachia-mlst/tree/master/alignments)  
299 [mlst/tree/master/alignments](https://github.com/gerthmicha/wolbachia-mlst/tree/master/alignments)) was taken from Gerth & Bleidorn (2016). See  
300 Supplementary Figure 1 for PI profiles for of all analysed loci.

301           Moreover, as already mentioned in the original MLST publication (Baldo *et al.*,  
302           2006), all MLST loci except for *ftsZ* show some level of intragenic recombination.  
303           Indeed, using all alleles present in the *Wolbachia* database today, signals of  
304           recombination can be detected for all five markers using the PHI test (Bruen *et al.*  
305           2006). The presence of horizontal genetic exchange makes the interpretation of  
306           phylogenetic analyses of MLST genes challenging, as the resulting tree may not reflect  
307           the evolutionary relationships of the analysed strains (Holmes *et al.* 1999; Jiggins *et al.*  
308           2001). When comparing the phylogenetic reconstruction for the dataset in Fig. 3 using  
309           the five concatenated MLST-fragments with the original analysis based on 252  
310           orthologs, several differences in the topology are apparent (Fig. 4A, B). Seven internal  
311           nodes are reconstructed differently in the MLST-based analysis (Fig. 4B) and the  
312           branch length differences between analyses, especially within supergroups are striking.  
313           These differences are likely due to the misleading signal from recombination events.

314           ClonalFrame is a Bayesian phylogenetic framework that was developed  
315           especially for MLST datasets and capable of inferring relationships despite the presence  
316           of recombination (Didelot & Falush 2007). Nevertheless, analysing our dataset with  
317           ClonalFrame led to a similarly high number of conflicting nodes (six) in comparison to  
318           the phylogenomic dataset, and multiple polytomies (*i.e.*, unresolved nodes, Fig 4C).  
319           This shows that the usage of recombination-aware phylogenetic methods cannot  
320           circumvent the inherent problems of *Wolbachia* MLST genes as phylogenetic markers.  
321           As some level of conflict exists between the trees recovered from most single gene loci  
322           and the one from the supermatrix (Supplementary Fig. 2), whole genome based  
323           phylogenies are desirable to minimize biases.



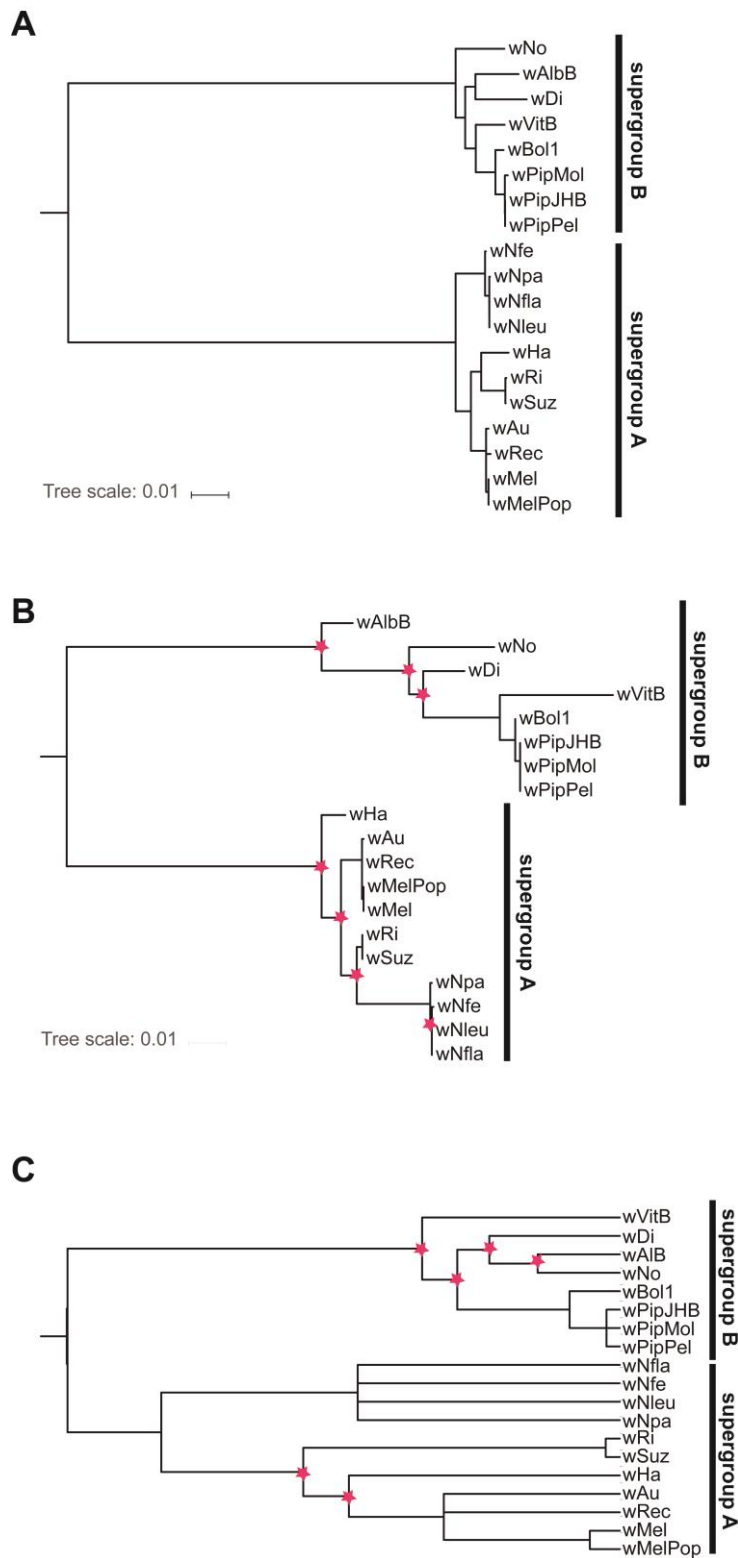

324

325

326

327

328

**Fig. 4** Phylogenetic reconstruction of supergroup A and B strains as selected by Gerth & Bleidorn (2016). A) Maximum likelihood analysis based on optimal partitions and models as selected by IQ-TREE (Nguyen et al. 2015) for a dataset containing nucleotide data of 252 non-recombining orthologs. B) Maximum likelihood reconstruction of five

329 MLST gene fragments of the same taxa using optimal partitions and models as selected  
330 by IQ-TREE. Seven conflicting nodes (red asterisks) compared to the phylogenomic  
331 analyses are highlighted. C) ClonalFrame (Didelot & Falush 2007) analysis of the  
332 MLST dataset, with six conflicting nodes highlighted (red asterisks).

333

334 Homologous recombination is widespread among Bacteria (Didelot & Maiden  
335 2010). One way to circumvent problems in phylogenetics arising from recombination is  
336 to estimate relationships between strains based on allele designations. A simple method  
337 for this is to cluster strains based on their similarity, which can be visualized as a  
338 dendrogram. However, strain similarity does not necessarily reflect common ancestry. A  
339 popular and more sophisticated method to analyse allele-based strain data is eBURST  
340 (Feil et al. 2004). This software incorporates a model of bacterial evolution in which  
341 strains that are increasing in frequency diversify, thereby forming clusters of similar  
342 genotypes. For MLST data, so-called clonal complexes are defined as groups that share  
343 a predefined number of alleles (e.g., three of five allele designations are identical) with  
344 at least one other strain type. After searching for these clonal complexes, the likely  
345 founding strain type is inferred, as are evolutionary relationships within this clonal  
346 complex. Simulation studies have shown that when recombination is absent or present  
347 in low to moderate levels, the inferred relationships of clonal complexes are very similar  
348 to the (known) true ancestry (Turner et al. 2007). However, increasing rates of the  
349 frequency of recombination to mutations led to a strong decrease in the reliability of  
350 eBURST analyses. In *Wolbachia*, the overall ratio of recombination to mutation events  
351 to explain the generation of a substitution is ranging from 2.3 to 8.2, depending on the  
352 analysed genome (Ellegaard et al. 2013). Therefore, the high recombination rates in  
353 *Wolbachia* genomes make allele-based analyses unreliable.

354 In addition to problems with recombination, there are also theoretical arguments  
355 against using ‘eBURST’-like clustering algorithms with *Wolbachia* MLST profiles.  
356 Because the only criterion for assigning a novel allele number is at least one nucleotide  
357 difference compared to all described alleles, any number of substitutions in one allele is  
358 weighted equally. For example, 10 different *Wolbachia* strains may be differentiated by  
359 only 9 nucleotide differences in total, or by 50, and could potentially be characterised by  
360 identical sets of MLST profiles. This makes comparing these profiles across systems  
361 challenging. When sampling is dense and therefore the majority of the allele diversity is  
362 known, this will likely not be problematic. However, this is rarely ever the case for  
363 *Wolbachia*. Given the large number of infected species, it is essentially impossible to  
364 know the true diversity of *Wolbachia* in any ecosystem. Furthermore, because horizontal  
365 transmissions are common (Baldo et al. 2008; Zug et al. 2012; Gerth et al. 2013; Ahmed  
366 et al. 2016), and exact pathways of these transmissions are still discussed (Huigens et al.  
367 2004; Le Clec’h et al. 2013; Li et al. 2016), it does not make sense to define “founding”  
368 and “descending” *Wolbachia* genotypes in most cases.

### 369 **Alternatives to MLST**

370 MLST was developed as a replacement for an earlier strain typing approach  
371 called multilocus enzyme electrophoresis (MLEE), which measured genetic variation by  
372 the resolution of electrophoretic variants (electromorphs) of metabolic enzymes  
373 (Maiden 2006). One problem of this method was that experiments were difficult to  
374 reproduce across labs. With the availability of affordable and faster Sanger sequencers it  
375 was possible to directly use sequence data instead of electromorphs. Nowadays, a wide  
376 array of different high-throughput sequencing techniques is available (Bleidorn 2015;  
377 Goodwin et al. 2016). Due to their small size, sequencing of complete bacterial  
378 genomes is affordable and routinely carried out using benchtop sequencers in

379 laboratories with standard equipment (Loman & Pallen 2015). Consequently, strain  
380 typing methods based on whole genome data were proposed, e.g., rMLST, in which a  
381 set of 53 ribosomal proteins is used (Jolley et al. 2012). Ribosomal proteins are  
382 universally found in bacterial genomes, show a wide distribution across genomes and  
383 are expected to underlie stabilizing selection, similar to the above mentioned MLST  
384 genes. In the case of *Wolbachia*, ribosomal proteins have already been used successfully  
385 for phylogenomic analyses (Nikoh et al. 2014). Other typing methods simply employ all  
386 available genes, i.e., whole genome sequence-typing (WGST) (Pérez-Losada et al.  
387 2013) or core genome MLST (cgMLST) (De Been et al. 2015).

388         Although *Wolbachia* harbour small genomes (1 to 1.5mbp in size) (Makepeace  
389 & Gill 2016), sequencing and assembly is more difficult than for many other Bacteria.  
390 As strictly intracellular endosymbionts, *Wolbachia* cannot be cultured axenically, and  
391 although maintaining them in cell cultures is possible (Dobson et al. 2002), it is very  
392 laborious and often not practical. Thus, in many cases a metagenomic sequencing  
393 approach is used, targeting both host and *Wolbachia* DNA. *Wolbachia* sequence data  
394 can then be retrieved using BLAST-searches and read mapping (Gerth et al. 2014).  
395 However, in this case a high sequencing depth per genome is needed, as typically only a  
396 small proportion of the reads will be of *Wolbachia* origin. For more efficient sequencing  
397 of *Wolbachia* genomes, target enrichment protocols (Lemmon & Lemmon 2012) have  
398 been established (Geniez et al. 2012; Dunning-Hotopp et al. 2017), although these are  
399 not yet broadly applied.

400         Another problem in *Wolbachia* genome sequencing is the high density of mobile  
401 genetic elements with repetitive sequence motives (Wu et al. 2004), which may lead to  
402 very fragmented assemblies. However, for analyses focussing on sequence data of  
403 selected loci and not on synteny, incompletely assembled *Wolbachia* draft genomes are

404 sufficient. Working with complete (or draft) genomes has the advantage that  
405 comparative analyses can be used to retrieve large sets of orthologous and  
406 recombination-free loci (Comandatore et al. 2013). These datasets allow to circumvent  
407 almost all problems with MLST outlined in this article, and further enable the  
408 identification hypervariable regions such as tandem repeat markers (Riegler et al. 2012)  
409 or ankyrin repeat domains (Siozios et al. 2013b).

410 Although whole genome approaches are the arguably the best way to address  
411 *Wolbachia* strain differentiation, diversity estimates, and phylogeny, they may in some  
412 cases be too cost- or time intensive, and there will be questions that must be addressed  
413 with a small number of genetic marker loci. In this case we here provide a  
414 characterization of 252 conserved single copy genes by a number of criteria, each of  
415 which may be important in strain typing, depending on the question to be addressed  
416 (Supplementary Table 1). We point out that for none of these criteria, the MLST loci  
417 perform particularly well, and we therefore strongly suggest to chose marker loci based  
418 on the experimental design rather than on the convenient availability

## 419 **Summary & conclusion**

420 MLST analyses are widely used in the community of *Wolbachia* researchers and  
421 a large database for comparative studies is available. This database and the availability  
422 of PCR protocols for most *Wolbachia* strains represent a convenient and valuable  
423 resource. However, for most tasks routinely employed for, *Wolbachia* MLST markers  
424 are unsuited. They are too conserved to allow reliable and fine-scaled strain  
425 differentiation, they do not reflect genome wide divergence rates well, and they are poor  
426 phylogenetic markers at shallow or deep divergence levels. Further, they are  
427 outcompeted at all of these tasks by other loci. These properties make the definition of a  
428 strain in the genus *Wolbachia* per MLST very problematic and we recommend that this

429 practice is discontinued. Instead, we advise to tailor adequate marker loci as required for  
430 the investigated strains. Naturally, these will differ between study systems and research  
431 questions, but we think that the shortcomings of MLST loci outweigh their benefit of  
432 universality. Generally, we hope that the *Wolbachia* community will embrace whole  
433 genome typing methods, which are already standardly employed in clinical  
434 microbiology. However, efficient novel *Wolbachia* genome sequencing (or enrichment)  
435 protocols are needed for this to succeed.

## 436 **Methods**

### 437 *Data acquisition*

438 Most MLST sequences, isolates and profiles described and analysed in this paper  
439 were downloaded from the *Wolbachia* PubMLST database (Jolley et al. 2004; Baldo et  
440 al. 2006; <https://pubmlst.org/wolbachia/>, last accessed 17th of August 2017). For  
441 comparative analysis of 19 supergroup A and B *Wolbachia* strains, the corresponding  
442 MLST gene sequences were recovered via blastn (Camacho et al. 2009) searches  
443 against coding nucleotide sequences of the 19 *Wolbachia* strains, using MLST  
444 sequences from the online database as a query. The hits were trimmed manually to  
445 conform to the length of *Wolbachia* MLST alleles. In addition, 252 loci from complete  
446 or draft *Wolbachia* genomes were acquired as described in Gerth & Bleidorn (2016).  
447 Briefly, the 252 loci were single copy genes present in all of the 19 investigated  
448 *Wolbachia* strains that did not show evidence for recombination. Orthology was  
449 assessed with OrthoFinder version 0.2.8 (Emms & Kelly 2015), and alignment was  
450 performed based on codons using Mafft version 7.215 (Kato & Standley 2013). In the  
451 following, the performance of *Wolbachia* MLST loci was compared to that of the 252  
452 loci with regard to their ability to differentiate strains, to approximate genome-wide  
453 divergence, and to reflect core genome phylogeny.

454 For the sake of completeness, these comparisons also included *wsp* (*Wolbachia*  
455 surface protein). Although not very commonly in use today, it was suggested as  
456 additional marker in *Wolbachia* typing schemes (Baldo et al. 2006) and was the standard  
457 molecular marker for *Wolbachia* before the development of MLST (Zhou et al. 1998).  
458 However, it was repeatedly pointed out that *wsp* is not a suitable marker for molecular  
459 typing of *Wolbachia* strains (Paraskevopoulos et al. 2006; Baldo & Werren 2007).

#### 460 *Strain differentiation*

461 Strain differentiation ability was assessed for all investigated loci by the  
462 proportion of distinct alleles in all alleles. This was calculated using the function  
463 'haplotype' of the R package pegas (Paradis 2010; R Core Team 2015). As additional  
464 measures of strains differentiation, we calculated average pairwise genetic distances and  
465 the number of variable alignment sites using the functions 'dist.dna' and 'seg.sites' of the  
466 R package APE (Paradis et al. 2004), respectively. All measures can be found in  
467 Supplementary Table 1.

468 To determine the resolution of the single, two, three or four most variable MLST  
469 loci in comparison to all five loci, we randomly sampled MLST profiles from the  
470 known diversity of MLST strains in the pubMLST database (at the time of the analysis,  
471 740 complete MLST profiles, 472 of which were unique). Random sampling was  
472 performed for datasets of 1–100 samples, and repeated 10,000 times in all cases. The  
473 number of distinct isolates among the samples based on a single, two, three or four  
474 MLST loci was counted and compared to the number of distinct isolated based on  
475 complete MLST profiles.

#### 476 *Divergence rates*

477 For all investigated loci, we aimed to assess how well genetic distances of a  
478 single locus reflect the genetic distances of the core genome. To this end, we calculated

479 all possible pairwise raw genetic distances (55 pairwise distances for 19 strains  
480 analysed) for each MLST locus, *wsp*, and for the concatenated 252 loci (as  
481 approximation of the core genome) as described above. Next, the correlation of the  
482 distances from each single locus with the core genome was determined by fitting a  
483 linear model within the R statistical framework. All  $R^2$  values for these models can be  
484 found in Supplementary Table 1. Due to the nature of the dataset, there is a bimodal  
485 distribution of distances: large distances between supergroups, and small distances  
486 within supergroups. Using this biased dataset, all correlation measures for all loci were  
487 very high. Therefore, we decided it would be more appropriate to perform this analysis  
488 separately for each supergroup.

#### 489 *Phylogenetic analyses*

490 Phylogenetic analyses of 19 *Wolbachia* strains was performed for a dataset of  
491 five concatenated MLST genes, one dataset of 252 concatenated single copy orthologs  
492 and for each of the 258 investigated loci (5 MLST genes, 252 core genome loci, *wsp*)  
493 separately. For all analyses, a maximum likelihood tree search was performed with IQ-  
494 TREE version version 1.5.4 (Nguyen et al. 2015) using the implemented optimal model  
495 search and, for multi-gene analyses, optimal partition selection algorithms (Lanfear et  
496 al. 2012; Chernomor et al. 2016; Kalyaanamoorthy et al. 2017). The MLST dataset was  
497 further analysed with ClonalFrame version 1.2 (Didelot & Falush 2007), using four  
498 independent runs with 1,000,000 generations each and a burnin of 50% for all runs.  
499 Convergence of runs and stability of sampled parameters was verified by plotting  
500 likelihood values and other parameters in R. All runs converged on identical topologies.  
501 Congruence and conflict between single gene analyses and core genome analysis was  
502 also assessed by calculating normalized Robinson-Foulds distances (Robinson & Foulds  
503 1981) with RAxML version 8.2.1 (Stamatakis 2014) between single gene trees and the



504 tree that best represented core genome phylogeny. Additionally, we calculated the  
505 likelihood of each single gene topology with RAxML using the 252 loci dataset.  
506 Congruence was approximated by calculating the difference between core genome  
507 topology log likelihood and the likelihoods of each single gene analysis  
508 Finally, phylogenetic informativeness (PI), i.e., the relative amount of  
509 phylogenetic signal to noise across time was estimated for all analysed loci using  
510 TAPIR (Faircloth et al. 2012), an efficient implementation of Townsend's phylogenetic  
511 informativeness (Townsend 2007), which makes use of the HyPhy software package  
512 (Pond & Muse 2005). To this end, an ultrametric tree of the analysed *Wolbachia* strains  
513 was taken from (Gerth & Bleidorn 2016).

#### 514 **Funding**

515 This work was supported by the Spanish Ministry of Science and Education (MEC)  
516 [RYC-2014-15615 to CB]; European Molecular Biology Organization [ALTF 48-2015  
517 to MG]; and Marie-Curie Actions of the European Commission [LTFCOFUND2013,  
518 GA-2013-609409 to MG].

#### 519 **References**

- 520 Achtman M (2008) Evolution, population structure, and phylogeography of genetically  
521 monomorphic bacterial pathogens. *Annual Review of Microbiology* **62**, 53–70.
- 522 Achtman M (2012) Insights from genomic comparisons of genetically monomorphic  
523 bacterial pathogens. *Philosophical Transactions of the Royal Society of London B:*  
524 *Biological Sciences* **367**, 860–867.
- 525 Ahmed MZ, Breinholt JW, Kawahara AY (2016) Evidence for common horizontal  
526 transmission of *Wolbachia* among butterflies and moths. *BMC Evolutionary Biology*  
527 **16**, .
- 528 Atyame CM, Delsuc F, Pasteur N, Weill M, Duron O (2011) Diversification of  
529 *Wolbachia* endosymbiont in the *Culex pipiens* mosquito. *Molecular Biology and*  
530 *Evolution* **28**, 2761–2772.

- 531 Baily-Bechet M, Martins-Simões P, Szöllösi G, Mialdea G, Sagot M-F, Charlat S  
532 (2017) How long does *Wolbachia* remain on board?. *Molecular Biology and*  
533 *Evolution* **13**, 1183–1193.
- 534 Baldo L, Ayoub NA, Hayashi CY, Russell JA, Stahlhut JK, Werren JH (2008) Insight  
535 into the routes of *Wolbachia* invasion: high levels of horizontal transfer in the spider  
536 genus *Agelenopsis* revealed by *Wolbachia* strain and mitochondrial DNA diversity.  
537 *Molecular Ecology* **17**, 557–569.
- 538 Baldo L, Dunning Hotopp JC, Jolley KA, Bordenstein SR, Biber SA, Choudhury RR,  
539 Hayashi C, Maiden MCJ, Tettelin H, Werren JH (2006) Multilocus sequence typing  
540 system for the endosymbiont *Wolbachia pipientis*. *Applied and Environmental*  
541 *Microbiology* **72**, 7098–7110.
- 542 Baldo L, Werren JH (2007) Revisiting *Wolbachia* supergroup typing based on WSP:  
543 Spurious lineages and discordance with MLST. *Current Microbiology* **55**, 81–87
- 544 Bleidorn C (2015) Third generation sequencing: technology and its potential impact on  
545 evolutionary biodiversity research. *Systematics and Biodiversity* **14**, 1–8.
- 546 Bruen TC, Philippe H, Bryant D (2006) A simple and robust statistical test for detecting  
547 the presence of recombination. *Genetics* **172**, 2665–2681.
- 548 Camacho C, Coulouris G, Avagyan V, Ma N, Papadopoulos J, Bealer K, Madden TL  
549 (2009) BLAST+: architecture and applications. *BMC Bioinformatics* **10**, 421.
- 550 Cerveau N, Leclercq S, Leroy E, Bouchon D, Cordaux R (2011) Short and long-term  
551 evolutionary dynamics of bacterial insertion sequences: insights from *Wolbachia*  
552 endosymbionts. *Genome Biology and Evolution* **3**, 1175–1186.
- 553 Chernomor O, von Haeseler A, Minh BQ (2016) Terrace aware data structure for  
554 phylogenomic inference from supermatrices. *Systematic Biology* **65**, 997-1008.
- 555 Comandatore F, Sasser D, Montagna M, Kumar S, Koutsovoulos G, Thomas G,  
556 Repton C, Babayan S a, Gray N, Cordaux R, Darby AC, Makepeace B, Blaxter ML  
557 (2013) Phylogenomics and analysis of shared genes suggest a single transition to  
558 mutualism in *Wolbachia* of nematodes. *Genome Biology and Evolution* **5**, 1668–  
559 1674.
- 560 Conner WR, Blaxter ML, Anfora G, Ometto L, Rota-Stabelli O, Turelli M (2017)  
561 Genome comparisons indicate recent transfer of wRi-like *Wolbachia* between sister  
562 species *Drosophila suzukii* and *D subpulchrella*. *bioRxiv* , 135475.
- 563 Cooper JE, Feil EJ (2004) Multilocus sequence typing—what is resolved?. *Trends in*  
564 *Microbiology* **12**, 373–377.
- 565 De Been M, Pinholt M, Top J, Bletz S, Mellmann A, Van Schaik W, Brouwer E, Rogers  
566 M, Kraat Y, Bonten M, others (2015) Core genome multilocus sequence typing  
567 scheme for high-resolution typing of *Enterococcus faecium*. *Journal of Clinical*  
568 *Microbiology* **53**, 3788–3797.

- 569 Didelot X, Falush D (2007) Inference of bacterial microevolution using multilocus  
570 sequence data. *Genetics* **175**, 1251–1266.
- 571 Didelot X, Maiden MC (2010) Impact of recombination on bacterial evolution. *Trends*  
572 *in Microbiology* **18**, 315–322.
- 573 Dobson SL, Marsland EJ, Veneti Z, Bourtzis K, O'Neill SL (2002) Characterization of  
574 *Wolbachia* host cell range via the in vitro establishment of infections. *Applied and*  
575 *Environmental Microbiology* **68**, 656–660.
- 576 Dunning-Hotopp JC, Slatko BE, Foster JM (2017) Targeted enrichment and sequencing  
577 of recent endosymbiont-host lateral gene transfers. *Scientific Reports* **7**, 857.
- 578 Ellegaard KM, Klasson L, Näslund K, Bourtzis K, Andersson SGE (2013) Comparative  
579 genomics of *Wolbachia* and the bacterial species concept. *Plos Genetics* **9**, e1003381.
- 580 Emms DM, Kelly S (2015) OrthoFinder: solving fundamental biases in whole genome  
581 comparisons dramatically improves orthogroup inference accuracy. *Genome Biology*  
582 **16**, 157.
- 583 Faircloth BC, Chang J, Alfaro ME (2012) TAPIR enables high-throughput estimation  
584 and comparison of phylogenetic informativeness using locus-specific substitution  
585 models. *arXiv preprint 1202.1215*, .
- 586 Feil EJ, Li BC, Aanensen DM, Hanage WP, Spratt BG (2004) eBURST: inferring  
587 patterns of evolutionary descent among clusters of related bacterial genotypes from  
588 multilocus sequence typing data. *Journal of Bacteriology* **186**, 1518–1530.
- 589 Fenton A, Johnson KN, Brownlie JC, Hurst GDD (2011) Solving the *Wolbachia*  
590 paradox: Modeling the tripartite interaction between host, *Wolbachia*, and a natural  
591 enemy. *The American Naturalist* **178**, 333–342.
- 592 Francisco AP, Bugalho M, Ramirez M, Carriço JA (2009) Global optimal eBURST  
593 analysis of multilocus typing data using a graphic matroid approach. *BMC*  
594 *Bioinformatics* **10**, 152.
- 595 Geniez S, Foster JM, Kumar S, Moumen B, LeProust E, Hardy O, Guadalupe M,  
596 Thomas SJ, Boone B, Hendrickson C, Bouchon D, Grève P, Slatko BE (2012)  
597 Targeted genome enrichment for efficient purification of endosymbiont DNA from  
598 host DNA. *Symbiosis* **58**, 201–207.
- 599 Gerth M (2016) Classification of *Wolbachia* (Alphaproteobacteria, Rickettsiales): No  
600 evidence for a distinct supergroup in cave spiders. *Infection, Genetics and Evolution*  
601 **43**, 378–380.
- 602 Gerth M, Bleidorn C (2016) Comparative genomics provides a timeframe for *Wolbachia*  
603 evolution and exposes a recent biotin synthesis operon transfer. *Nature Microbiology*  
604 **2**, 16241.
- 605 Gerth M, Gansauge M-T, Weigert A, Bleidorn C (2014) Phylogenomic analyses uncover  
606 origin and spread of the *Wolbachia* pandemic. *Nature Communications* **5**, 5117.

- 607 Gerth M, Röthe J, Bleidorn C (2013) Tracing horizontal *Wolbachia* movements among  
608 bees (Anthophila): a combined approach using MLST data and host phylogeny.  
609 *Molecular Ecology* **22**, 6149–6162.
- 610 Glowska E, Dragun-Damian A, Dabert M, Gerth M (2015) New *Wolbachia* supergroups  
611 detected in quill mites (Acari: Syringophilidae). *Infection, Genetics and Evolution*  
612 **30**, 140–146.
- 613 Goodwin S, McPherson JD, McCombie WR (2016) Coming of age: ten years of next-  
614 generation sequencing technologies. *Nature Reviews Genetics* **17**, 333–351.
- 615 Hedges LM, Brownlie JC, O'Neill SL, Johnson KN (2008) *Wolbachia* and virus  
616 protection in insects. *Science* **322**, 702.
- 617 Hoffmann AA, Montgomery BL, Popovici J, Iturbe-Ormaetxe I, Johnson PH, Muzzi F,  
618 Greenfield M, Durkan M, Leong YS, Dong Y, Cook H, Axford J, Callahan AG,  
619 Kenny N, Omodei C, McGraw EA, Ryan PA, Ritchie SA, Turelli M, O'Neill SL  
620 (2011) Successful establishment of *Wolbachia* in *Aedes* populations to suppress  
621 dengue transmission. *Nature* **476**, 454–457.
- 622 Huigens ME, de Almeida RP, Boons PAH, Luck RF, Stouthamer R (2004) Natural  
623 interspecific and intraspecific horizontal transfer of parthenogenesis-inducing  
624 *Trichogramma* wasps. *Proceedings of the Royal Society of London B-Biological*  
625 *Sciences* **271**, 509–515.
- 626 Ishmael N, Hotopp JCD, Ioannidis P, Biber S, Sakamoto J, Siozios S, Nene V, Werren  
627 JH, Bourtzis K, Bordenstein SR, Tettelin H (2009) Extensive genomic diversity of  
628 closely related *Wolbachia* strains. *Microbiology* **155**, 2211–2222.
- 629 Jolley KA, Bliss CM, Bennett JS, Bratcher HB, Brehony C, Colles FM, Wimalaratna  
630 H, Harrison OB, Sheppard SK, Cody AJ, others (2012) Ribosomal multilocus  
631 sequence typing: universal characterization of bacteria from domain to strain.  
632 *Microbiology* **158**, 1005–1015.
- 633 Jolley K, Chan M-S, Maiden M (2004) mlstdbNet - distributed multi-locus sequence  
634 typing (MLST) databases. *Bmc Bioinformatics* **5**, 86.
- 635 Kalyaanamoorthy S, Minh BQ, Wong TKF, von Haeseler A, Jermin LS (2017)  
636 ModelFinder: fast model selection for accurate phylogenetic estimates. *Nat Meth* **14**,  
637 587–589.
- 638 Katoh K, Standley DM (2013) MAFFT multiple sequence alignment software version 7:  
639 improvements in performance and usability. *Molecular Biology and Evolution* **30**,  
640 772–780.
- 641 Kriesner P, Hoffmann AA, Lee SF, Turelli M, Weeks AR (2013) Rapid sequential spread  
642 of two *Wolbachia* variants in *Drosophila simulans*. *Plos Pathogens* **9**, e1003607.
- 643 Lanfear R, Calcott B, Ho SYW, Guindon S (2012) Partitionfinder: combined selection  
644 of partitioning schemes and substitution models for phylogenetic analyses.  
645 *Molecular Biology and Evolution* **29**, 1695–701.

- 646 Le Clec'h W, Chevalier FD, Genty L, Bertaux J, Bouchon D, Sicard M (2013)  
647 Cannibalism and predation as paths for horizontal passage of *Wolbachia* between  
648 terrestrial isopods. *Plos One* **8**, e60232.
- 649 Lemmon EM, Lemmon AR (2012) High-throughput genomic data in systematics and  
650 phylogenetics. *Annual Review of Ecology, Evolution, and Systematics* **44**,  
651 131010123440000.
- 652 Li S-J, Ahmed MZ, Lv N, Shi P-Q, Wang X-M, Huang J-L, Qiu B-L (2016) Plant-  
653 mediated horizontal transmission of *Wolbachia* between whiteflies. *The ISME*  
654 *Journal* **11**, 1019–1028.
- 655 Loman NJ, Pallen MJ (2015) Twenty years of bacterial genome sequencing. *Nature*  
656 *Reviews Microbiology* **13**, 787.
- 657 Maiden MC (2006) Multilocus sequence typing of bacteria. *Annual Review of*  
658 *Microbiology* **60**, 561–588.
- 659 Maiden MCJ, Bygraves JA, Feil E, Morelli G, Zhang Q, Zhou J, Zurth K, Feavers IM,  
660 Achtman M, Spratt BG (1998) Multilocus sequence typing: A portable approach to  
661 the identification of clones within populations of pathogenic microorganisms.  
662 *Proceedings of The National Academy of Sciences of The United States of America*  
663 **95**, 3140–3145.
- 664 Makepeace, B.L., Gill, A.C. (2016) *Wolbachia*. In: Thomas, S. (Ed.) *Rickettsiales.*  
665 *Biology, Molecular Biology, Epidemiology, and Vaccine Development*, Springer  
666 Nature.
- 667 Newton IL, Clark ME, Kent BN, Bordenstein SR, Qu J, Richards S, Kelkar YD, Werren  
668 JH (2016) Comparative genomics of two closely related *Wolbachia* with different  
669 reproductive effects on hosts. *Genome Biology and Evolution* **8**, 1526–1542.
- 670 Nguyen L-T, Schmidt HA, von Haeseler A, Minh BQ (2015) IQ-TREE: a fast and  
671 effective stochastic algorithm for estimating maximum-likelihood phylogenies.  
672 *Molecular Biology and Evolution* **32**, 268–274.
- 673 Nikoh N, Hosokawa T, Moriyama M, Oshima K, Hattori M, Fukatsu T (2014)  
674 Evolutionary origin of insect-*Wolbachia* nutritional mutualism. *Proceedings of The*  
675 *National Academy of Sciences of The United States of America-physical Sciences*  
676 **111**, 10257–10262.
- 677 O'Neill SL, Giordano R, Colbert AM, Karr TL, Robertson HM (1992) 16S rRNA  
678 phylogenetic analysis of the bacterial endosymbionts associated with cytoplasmic  
679 incompatibility in insects. *Proceedings of The National Academy of Sciences of The*  
680 *United States of America-physical Sciences* **89**, 2699–2702.
- 681 Paradis E (2010) pegas: an R package for population genetics with an integrated–  
682 modular approach. *Bioinformatics* **26**, 419–420.
- 683 Paradis E, Claude J, Strimmer K (2004) APE: analyses of phylogenetics and evolution  
684 in R language. *Bioinformatics* **20**, 289–290.

- 685 Paraskevopoulos C, Bordenstein SR, Wernegreen JJ, Werren JH, Bourtzis, K (2006)  
686 Toward a *Wolbachia* multilocus sequence typing system: Discrimination of  
687 *Wolbachia* strains present in *Drosophila* species. *Current Microbiology* **53**, 388–395.
- 688 Pérez-Losada M, Cabezas P, Castro-Nallar E, Crandall KA (2013) Pathogen typing in  
689 the genomics era: MLST and the future of molecular epidemiology. *Infection,*  
690 *Genetics and Evolution* **16**, 38–53.
- 691 Pond SLK, Muse SV (2005) HyPhy: hypothesis testing using phylogenies.  
692 *Bioinformatics* **21**, 125–181.
- 693 Riegler M, Iturbe-Ormaetxe I, Woolfit M, Miller W, O'Neill SL (2012) Tandem repeat  
694 markers as novel diagnostic tools for high resolution fingerprinting of *Wolbachia*.  
695 *BMC Microbiology* **12**, S12.
- 696 Robinson DF, Foulds LR (1981) Comparison of phylogenetic trees. *Mathematical*  
697 *biosciences* **53**, 131–147.
- 698 Russell JA, Goldman-Huertas B, Moreau CS, Baldo L, Stahlhut JK, Werren JH, Pierce  
699 NE (2009) Specialization and geographic isolation among *Wolbachia* symbionts  
700 from ants and lycaenid butterflies. *Evolution* **63**, 624–640.
- 701 Schuler H, Bertheau C, Egan SP, Feder JL, Riegler M, Schlick-Steiner BC, Steiner FM,  
702 Johannesen J, Kern P, Tuba K, Lakatos F, Köppler K, Arthofer W, Stauffer C (2013)  
703 Evidence for a recent horizontal transmission and spatial spread of *Wolbachia* from  
704 endemic *Rhagoletis cerasi* (Diptera: Tephritidae) to invasive *Rhagoletis cingulata* in  
705 Europe. *Molecular Ecology* **22**, 4101–4111.
- 706 Siozios S, Cestaro A, Kaur R (2013a) Draft genome sequence of the *Wolbachia*  
707 endosymbiont of *Drosophila suzukii*. *Genome Announcements* **1**, e00032–13.
- 708 Siozios S, Ioannidis P, Klasson L, Andersson SGE, Braig HR, Bourtzis K (2013b) The  
709 diversity and evolution of *Wolbachia* ankyrin repeat domain genes. *Plos One* **8**,  
710 e55390.
- 711 Sontowski R, Bernhard D, Bleidorn C, Schlegel M, Gerth M (2015) *Wolbachia*  
712 distribution in selected beetle taxa characterized by PCR screens and MLST data.  
713 *Ecology and Evolution* **5**, 4345–4353.
- 714 Stahlhut JK, Desjardins CA, Clark ME, Baldo L, Russell JA, Werren JH, Jaenike J  
715 (2010) The mushroom habitat as an ecological arena for global exchange of  
716 *Wolbachia*. *Molecular Ecology* **19**, 1940–1952.
- 717 Stamatakis A (2014) RAxML version 8: a tool for phylogenetic analysis and post-  
718 analysis of large phylogenies. *Methods of Biochemical Analysis* **30**, 1312–1313.
- 719 Tanaka K, Furukawa S, Nikoh N, Sasaki T, Fukatsu T (2009) Complete wo phage  
720 sequences reveal their dynamic evolutionary trajectories and putative functional  
721 elements required for integration into the *Wolbachia* genome. *Applied and*  
722 *Environmental Microbiology* **75**, 5676–5686.

- 723 R Core Team (2015) *R: A language and environment for statistical computing*. R  
724 Foundation for Statistical Computing, Vienna, Austria.
- 725 Teixeira L, Ferreira A, Ashburner M (2008) The bacterial symbiont *Wolbachia* induces  
726 resistance to RNA viral infections in *Drosophila melanogaster*. *Plos Biology* **6**,  
727 e1000002.
- 728 Townsend JP (2007) Profiling phylogenetic informativeness. *Systematic Biology* **56**,  
729 222–231.
- 730 Turner KM, Hanage WP, Fraser C, Connor TR, Spratt BG (2007) Assessing the  
731 reliability of eBURST using simulated populations with known ancestry. *BMC*  
732 *Microbiology* **7**, 30.
- 733 Watanabe M, Tagami Y, Miura K, Kageyama D, Stouthamer R (2012) Distribution  
734 patterns of *Wolbachia* endosymbionts in the closely related flower bugs of the genus  
735 *Orius*: implications for coevolution and horizontal transfer. *Microbial Ecology* **64**,  
736 537–545.
- 737 Weinert LA, Araujo-Jnr EV, Ahmed MZ, Welch JJ (2015) The incidence of bacterial  
738 endosymbionts in terrestrial arthropods. *Proceedings of the Royal Society of London*  
739 *B-Biological Sciences* **282**, 20150249.
- 740 Werren JH, Baldo L, Clark ME (2008) *Wolbachia*: master manipulators of invertebrate  
741 biology. *Nature Reviews Microbiology* **6**, 741–751.
- 742 Wu M, Sun LV, Vamathevan J, Riegler M, Deboy R, Brownlie JC, McGraw EA, Martin  
743 W, Esser C, Ahmadinejad N, Wiegand C, Madupu R, Beanan MJ, Brinkac LM,  
744 Daugherty SC, Durkin AS, Kolonay JF, Nelson WC, Mohamoud Y, Lee P, Berry K,  
745 Young MB, Utterback T, Weidman J, Nierman WC, Paulsen IT, Nelson KE, Tettelin  
746 H, O'Neill SL, Eisen JA (2004) Phylogenomics of the reproductive parasite  
747 *Wolbachia pipientis* wMel: a streamlined genome overrun by mobile genetic  
748 elements. *Plos Biology* **2**, e69.
- 749 Zhang K-J, Han X, Hong X-Y (2013b) Various infection status and molecular evidence  
750 for horizontal transmission and recombination of *Wolbachia* and *Cardinium* among  
751 rice planthoppers and related species. *Insect Science* **20**, 329–44.
- 752 Zhang Y-K, Zhang K-J, Sun J-T, Yang X-M, Ge C, Hong X-Y (2013a) Diversity of  
753 *Wolbachia* in natural populations of spider mites (genus *Tetranychus*): evidence for  
754 complex infection history and disequilibrium distribution. *Microbial Ecology* **65**,  
755 731–9.
- 756 Zhou WG, Rousset F, O'Neill SL (1998) Phylogeny and PCR-based classification of  
757 *Wolbachia* strains using wsp gene sequences. *Proceedings of the Royal Society of*  
758 *London B-Biological Sciences* **265**, 509–515.
- 759 Zug R, Hammerstein P (2012) Still a host of hosts for *Wolbachia*: analysis of recent data  
760 suggests that 40% of terrestrial arthropod species are infected. *Plos One* **7**, e38544.

761 Zug R, Hammerstein P (2015) Bad guys turned nice? A critical assessment of *Wolbachia*  
762 mutualisms in arthropod hosts. *Biological Reviews of The Cambridge Philosophical*  
763 *Society* **90**, 89–111.

764 Zug R, Koehncke A, Hammerstein P (2012) Epidemiology in evolutionary time: the  
765 case of *Wolbachia* horizontal transmission between arthropod host species. *Journal*  
766 *of Evolutionary Biology* **25**, 2149–2160.

767

768

769
